# Supplementary material
Source: HighWire-hosted journal article supplement (https://jnis.bmj.com/content/neurintsurg-2020-015990)
Supplement: inline-supplementary-material-1 [file inline-supplementary-material-1.pdf]

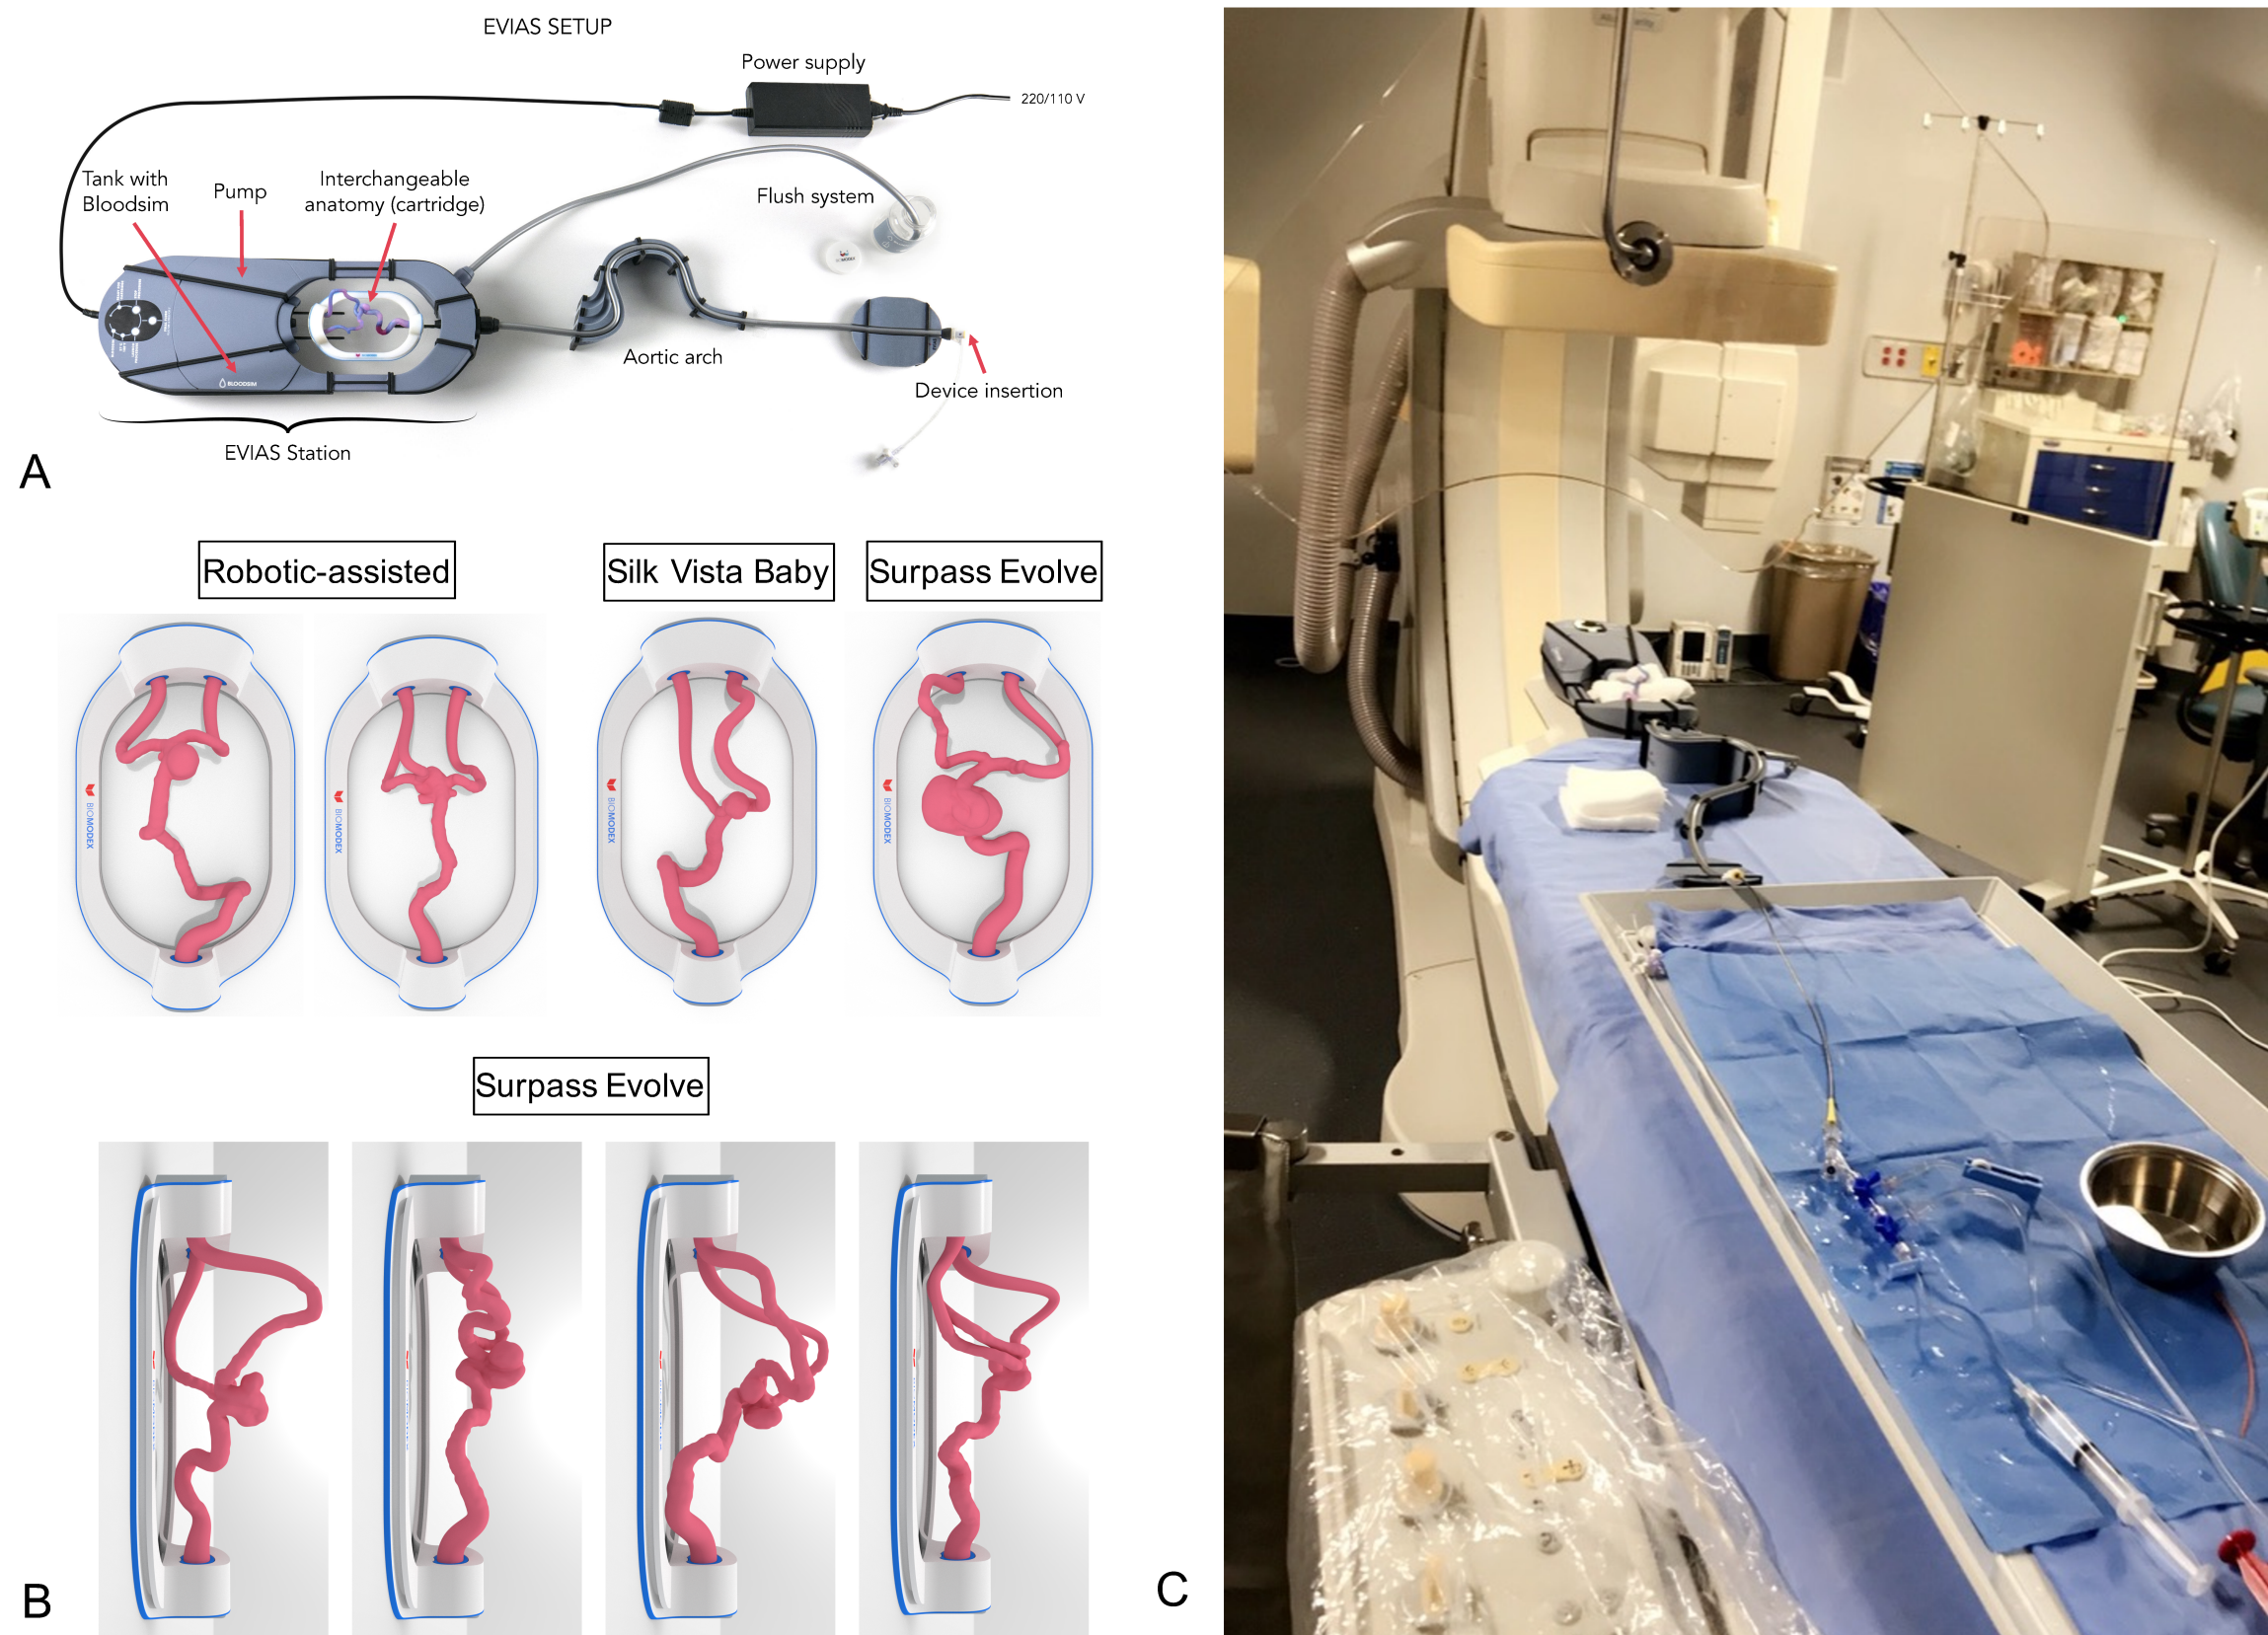

**Supplemental Figure 1** – (A) EVIAS (Endovascular Intracranial Aneurysm System) station components. (B) Interchangeable cartridges with 3D-printed patient-specific intracranial aneurysm models used in this study, treated either robotically or with novel flow diverting stents. (C) The in vitro model set-up in the angiosuite simulates the clinical procedures.
